# Supplementary material
Source: publisher site journal article supplement (https://www.dovepress.com/get_supplementary_file.php?f=490614.docx)
Supplement: Supplementary file 1 [file get_supplementary_file.php]

**Supplementary tables**

**Table S1 Comparison of other hematological and biochemical parameters between amputation group and non-amputation group**

| Indicators | Non-amputation group  (n = 29) | Amputation group  (n = 33) | *t*/*Z* | *P* |
| --- | --- | --- | --- | --- |
| Hematological parameters |  |  |  |  |
| WBC count (109/L) | 8.15 (6.79, 11.63) | 8.08 (6.01, 10.61) | -0.497 | 0.619 |
| Neutrophil count (109/L) | 5.41 (4.14, 10.30) | 5.31 (4.27, 7.68) | -0.446 | 0.655 |
| Neutrophil percentage (%) | 73.35 ± 13.57 | 71.74 ± 8.84 | 0.523 | 0.603 |
| Lymphocyte count (109/L) | 1.39 ± 0.59 | 1.58 ± 0.64 | -1.161 | 0.251 |
| Lymphocyte percentage (%) | 18.21 ± 11.20 | 18.67 ± 7.09 | -0.182 | 0.857 |
| Monocyte count (109/L) | 0.61 ± 0.36 | 0.62 ± 0.30 | -0.172 | 0.864 |
| Monocyte percentage (%) | 6.47 ± 3.00 | 7.02 ± 2.15 | -0.781 | 0.438 |
| Eosinophil count (109/L) | 0.11 ± 0.10 | 0.15 ± 0.14 | -1.166 | 0.249 |
| Eosinophil percentage (%) | 0.90 (0.20, 2.50) | 1.65 (0.68, 2.83) | -1.146 | 0.252 |
| Basophil count (109/L) | 0.03 (0.02, 0.04) | 0.03 (0.02, 0.04) | -0.395 | 0.693 |
| Basophil percentage (%) | 0.36 ± 0.22 | 0.39 ± 0.30 | -0.501 | 0.619 |
| MCV (fL) | 90.59 ± 4.40 | 89.24 ± 5.05 | 1.056 | 0.296 |
| MCH (pg) | 29.72 ± 1.80 | 28.91 ± 1.39 | 1.872 | 0.067 |
| MCHC (g/L) | 327.84 ± 9.34 | 323.73 ± 12.29 | 1.394 | 0.169 |
| Platelet (109/L) | 233.27 ± 87.05 | 281.90 ± 108.06 | -1.834 | 0.072 |
| MPV (fL) | 9.91 ± 1.52 | 9.76 ± 1.48 | 0.370 | 0.713 |
| PCT (%) | 0.23 ± 0.08 | 0.27 ± 0.09 | -1.895 | 0.064 |
| Biochemical parameters |  |  |  |  |
| Total protein (g/L) | 64.91 ± 7.84 | 66.04 ± 6.73 | -0.582 | 0.563 |
| Albumin (g/L) | 36.31 ± 8.03 | 34.22 ± 5.16 | 1.174 | 0.246 |
| Globulin (g/L) | 28.98 ± 4.74 | 31.82 ± 6.75 | -1.837 | 0.072 |
| A/G ratio | 1.32 ± 0.40 | 1.13 ± 0.32 | 1.923 | 0.060 |
| TBIL (μmol/L) | 14.05 (10.23, 18.95) | 11.00 (8.68, 14.45) | -1.857 | 0.063 |
| DBIL (μmol/L) | 3.60 (1.88, 5.90) | 3.10 (2.33, 4.85) | -0.370 | 0.712 |
| IBIL (μmol/L) | 9.85 (6.98, 14.43) | 8.40 (5.13, 10.63) | -1.733 | 0.083 |
| GGT (U/L) | 19.00 (14.50, 26.75) | 25.00 (15.00, 35.00) | -1.460 | 0.144 |
| ALP (U/L) | 95.58 ± 43.98 | 84.10 ± 26.57 | 1.185 | 0.241 |
| ALT (U/L) | 16.50 (10.25, 29.25) | 15.50 (11.00, 20.00) | -0.625 | 0.532 |
| AST (U/L) | 19.00 (12.00, 32.00) | 16.00 (13.00, 22.00) | -0.448 | 0.654 |
| ALT/AST ratio | 0.93 ± 0.37 | 0.94 ± 0.26 | -0.093 | 0.926 |
| Creatinine (μmol/L) | 147.99 ± 192.37 | 85.29 ± 39.42 | 1.602 | 0.121 |
| Cystatin C (mg/L) | 1.05 (0.98, 1.45) | 1.20 (0.92, 1.79) | -0.068 | 0.946 |
| BUN (mmol/L) | 5.16 (4.00, 7.54) | 6.46 (4.51, 8.03) | -0.921 | 0.357 |
| UA (μmol/L) | 313.47 ± 126.63 | 286.03 ± 120.26 | 0.823 | 0.414 |
| TG (mmol/L) | 1.02 (0.84, 1.33) | 1.15 (0.82, 1.34) | -0.233 | 0.816 |
| TC (mmol/L) | 3.53 ± 1.02 | 3.81 ± 1.03 | -0.950 | 0.347 |
| LDL (mmol/L) | 2.07 ± 0.86 | 2.19 ± 0.70 | -0.513 | 0.610 |
| HDL (mmol/L) | 0.95 ± 0.28 | 1.06 ± 0.31 | -1.343 | 0.186 |

Abbreviations: WBC, white blood cell; MCV, mean corpuscular volume; MCH, mean corpuscular haemoglobin; MCH, mean corpuscular haemoglobin; MCHC, mean corpuscular haemoglobin concentration; MPV, mean platelet volume; PCT, platelet crit; A/G ratio, albumin and globulin ratio; TBIL, total bilirubin; DBIL, direct bilirubin; IBIL, indirect bilirubin; GGT, gamma-glutamyl transpeptidase; ALP, alkaline phosphatase; ALT, alanine aminotransferase; AST, amino transferase; BUN, blood urea nitrogen; UA, uric acid; TG, triglyceride; TC, total cholesterol; LDL, low density lipoprotein; HDL, high density lipoprotein.

\**Table S2 Comparison of thyroid function and coagulation parameters between amputation group and non-amputation group**

| Indicators | Non-amputation group  (n = 29) | Amputation group  (n = 33) | *t*/*Z* | *P* |
| --- | --- | --- | --- | --- |
| Thyroid function parameters |  |  |  |  |
| TSH (μIU/ml) | 1.26 ± 0.71 | 2.32 ± 1.51 | -2.033 | 0.056 |
| fT3 (pmol/L) | 3.25 ± 0.87 | 3.06 ± 0.62 | 0.559 | 0.583 |
| fT4 (pmol/L) | 13.11 (6.69, 14.69) | 12.10 (1.16, 13.30) | -0.923 | 0.356 |
| Coagulation parameters |  |  |  |  |
| PT (s) | 11.98 ± 2.02 | 12.14 ± 1.35 | -0.337 | 0.737 |
| PT% (%) | 97.39 ± 24.93 | 91.92 ± 17.32 | 0.888 | 0.379 |
| INR | 1.05 ± 0.17 | 1.06 ± 0.11 | -0.351 | 0.727 |
| APTT (s) | 31.83 ± 3.91 | 31.69 ± 4.67 | 0.114 | 0.910 |
| FIB (g/L) | 14 (12.15, 15.65) | 14.10 (7.06, 15.40) | -0.276 | 0.783 |
| TT (s) | 4.22 (3.67, 8.27) | 5.29 (4.09, 15.30) | -1.493 | 0.136 |
| D-Dimer2 (μg/ml) | 0.51 (0.19, 1.17) | 0.65 (0.47, 1.15) | -1.120 | 0.263 |
| AT3 (%) | 96.82 ± 14.78 | 89.83 ± 13.59 | 1.574 | 0.124 |
| FDP (μg/ml) | 4.28 ± 5.07 | 4.44 ± 2.77 | -0.096 | 0.924 |

Abbreviations: TSH, thyroid-stimulating hormone; fT3, free triiodothyronine; fT4, free thyroxine; PT, prothrombin time; PT%, PT percentage activity; INR, international normalized ratio; APTT, activated partial thromboplastin time; FIB, fibrinogen; TT, thrombin time; AT3, antithrombin; FDP, fibrin/fibrinogen degradation products.
